# Supplementary material for: Resonance light scattering as a powerful tool for sensitive detection of β-amyloid peptide by gold nanoparticle probes
Source: Royal Society of Chemistry journal article supplement (doi:10.1039/c1cc12939b), 2011-01-01
Supplement: c1cc12939b.pdf [file c1cc12939b.pdf]

**Supporting information for:**

**Resonance light scattering as a powerful tool for sensitive detection of  $\beta$ -amyloid peptide by gold nanoparticle probes**

**Chengke Wang,<sup>a,b</sup> Dianjun Liu<sup>a</sup> and Zhenxin Wang<sup>\*,a</sup>**

<sup>a</sup> State Key Laboratory of Electroanalytical Chemistry, Changchun Institute of Applied Chemistry, Chinese Academy of Sciences, Changchun, China, 130022;

E-mail: wangzx@ciac.jl.cn

<sup>b</sup> Graduate School of the Chinese Academy of Sciences, Beijing, China, 100039.

## Experimental section

**Materials and reagents.** Peptides (CALNN, CALNN GK(biotin)G, and GK(biotin)G DAEFR HDSGY EVHHQ K ( $A\beta_{1-16}$ (biotin))) were purchased from Scilight Biotechnology Ltd. (Beijing, China). DAEFR HDSGY EVHHQ KLVFF AEDVG SNKGA IIGLM VGGVV IA ( $A\beta_{1-42}$ ) was purchased from A Peptide Ltd. (Shanghai, China). Hydrogen tetrachloroaurate trihydrate ( $HAuCl_4 \cdot 3H_2O$ ), 2-[4-(2-Hydroxyethyl)-1-piperazine]ethanesulfonic acid (HEPES), 2-(4-Morpholino)ethanesulfonic acid (MES) and human serum albumin (HSA) were purchased from Sigma-Aldrich Co. (USA). Streptavidin was purchased from Promega Co. (USA). The human plasma (HP) samples were obtained from healthy persons at No. 208 hospital of Liberation Army (Changchun, China). Other chemicals were analytical grade, and they were used as received. Milli-Q water (18.2 M $\Omega$ .cm) was used in all experiments.

**Preparation of streptavidin-conjugated nanoparticles.** The citrate stabilized 13 nm GNPs were synthesized by traditional Turkevich–Frens method.<sup>1</sup> Peptide-stabilized nanoparticles were prepared by previously reported peptide capping procedure.<sup>2</sup> Generally, an aqueous solution of peptide mixture (CALNN : CALNN GK(biotin)G = 9 : 1) was added to the solution of 1 mL 13 nm GNPs (5 nM) to give a final concentration of total peptides of 1.5 mM. After 1 h incubation, excess peptides were removed by repeated centrifugation at 8800 rpm (~ 7200 g, 3 times) using an Eppendorf centrifuge (Eppendorf, Germany). The purified GNPs were resuspended in 1 mL water. Then a 30  $\mu$ L streptavidin (2 mg mL<sup>-1</sup>) aqueous solution was added to the solution. After 1 h incubation, excess streptavidin was removed by repeated centrifugation at 8800 rpm (~ 7200 g, 3 times). The purified streptavidin-conjugated GNPs were resuspended in 1 mL HEPES buffer (pH 7.4 or 6.6, 10 mM HEPES, 0.8 % NaCl (w/w)) or MES buffer (pH 5.8 or 5.0, 10 mM MES, 0.8 % NaCl (w/w)), which were named as SA-GNPs. All experiments were carried out at room temperature except mentioned specially.

**Detect  $A\beta_{1-42}$  in aqueous solution.** Different kinds of  $A\beta_{1-16}$ (biotin) and Zn<sup>II</sup> complexes were prepared by adding desired amount of ZnCl<sub>2</sub> aqueous solution into 1 mL  $A\beta_{1-16}$ (biotin) solution in the absence or presence of different amounts of  $A\beta_{1-42}$ , and then incubated at 37 °C for 72 h, respectively. Subsequently, 50  $\mu$ L of the solutions were mixed thoroughly with 200  $\mu$ L of SA-GNPs (1.5 nM),

respectively. After 30 min incubation, the RLS spectra of these solutions were recorded on a Cary Eclipse Spectrophotometer (Varian Inc., USA). The RLS spectra were conducted by synchronous scanning of excitation wavelength ( $\lambda_{\text{ex}}$ ) and emission wavelength ( $\lambda_{\text{em}}$ ), and the used  $\lambda_{\text{ex}}$  is as same as  $\lambda_{\text{em}}$  during the scanning.

**Detect A $\beta$ <sub>1-42</sub> in diluted HP.** The similar detection procedure was used as described in aqueous solution, except that diluted HP was applied as reaction matrix. The diluted HP was prepared by adding fresh 10  $\mu\text{L}$  human plasma into the 990  $\mu\text{L}$  HEPES buffer samples, and mixed well. The A $\beta$ <sub>1-42</sub> spiked diluted HP samples were prepared by adding different amounts of A $\beta$ <sub>1-42</sub> into the as-prepared diluted HP, and mixed well.

**UV-visible spectra measurement.** UV-visible spectra of all solutions were recorded on a UV-visible spectrophotometer (UV mini 1240, Shimadzu Instruments, Japan).

**Dynamic light scattering (DLS) measurement.** The hydrodynamic diameters of GNPs were recorded by a Zetasizer Nano ZS DLS system (Malvern Instruments Ltd., England).

**TEM measurement.** TEM micrographs of all samples were obtained by a JEOL 2000FX (JEOL, Japan) operated at an accelerating voltage of 120 kV. Specimens were prepared by evaporating a droplet of sample solution on a carbon-coated copper mesh grid and dried in the air. The grid was then incubated with phosphotungstic acid (1 % (w/v), 10  $\mu\text{L}$ ) for 1 min, washed with water and dried at room temperature in the air.

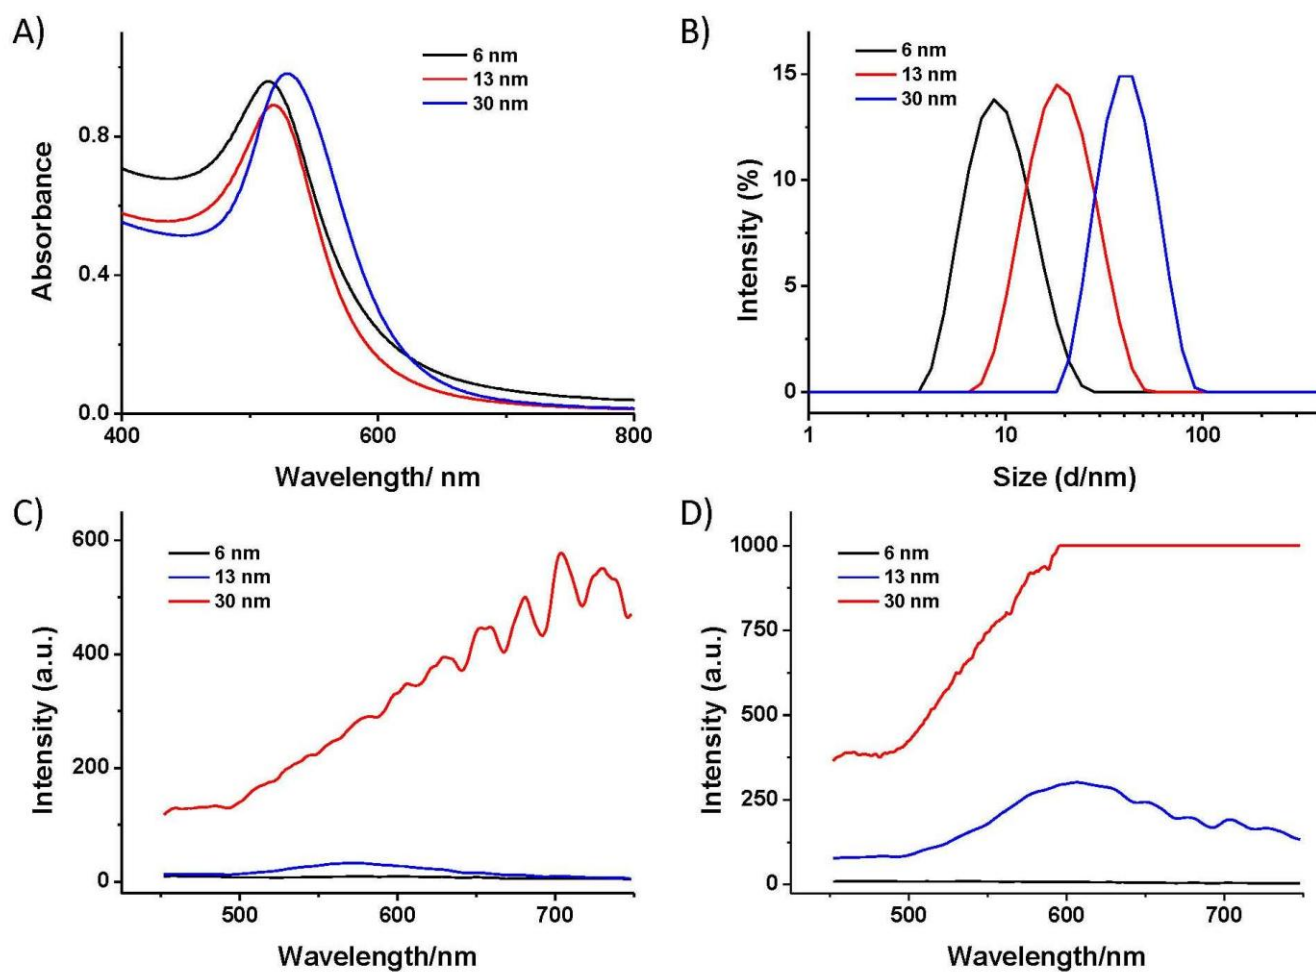

**Fig. S1** The UV-visible spectra (A) and hydrodynamic diameter distributions (B) of as-prepared GNPs. Corresponding RLS spectra of SA-GNPs only (C), and the SA-GNPs after incubated with  $\text{Zn}^{\text{II}}$  induced  $\text{A}\beta_{1-16}(\text{biotin})$  aggregates in HEPES solution (D), respectively. The concentration of  $\text{A}\beta_{1-16}(\text{biotin})$  is  $2.0 \mu\text{g mL}^{-1}$ , the concentration of  $\text{Zn}^{\text{II}}$  is  $4.0 \mu\text{M}$ , and the concentration of SA-GNPs is  $1.2 \text{ nM}$ , respectively.

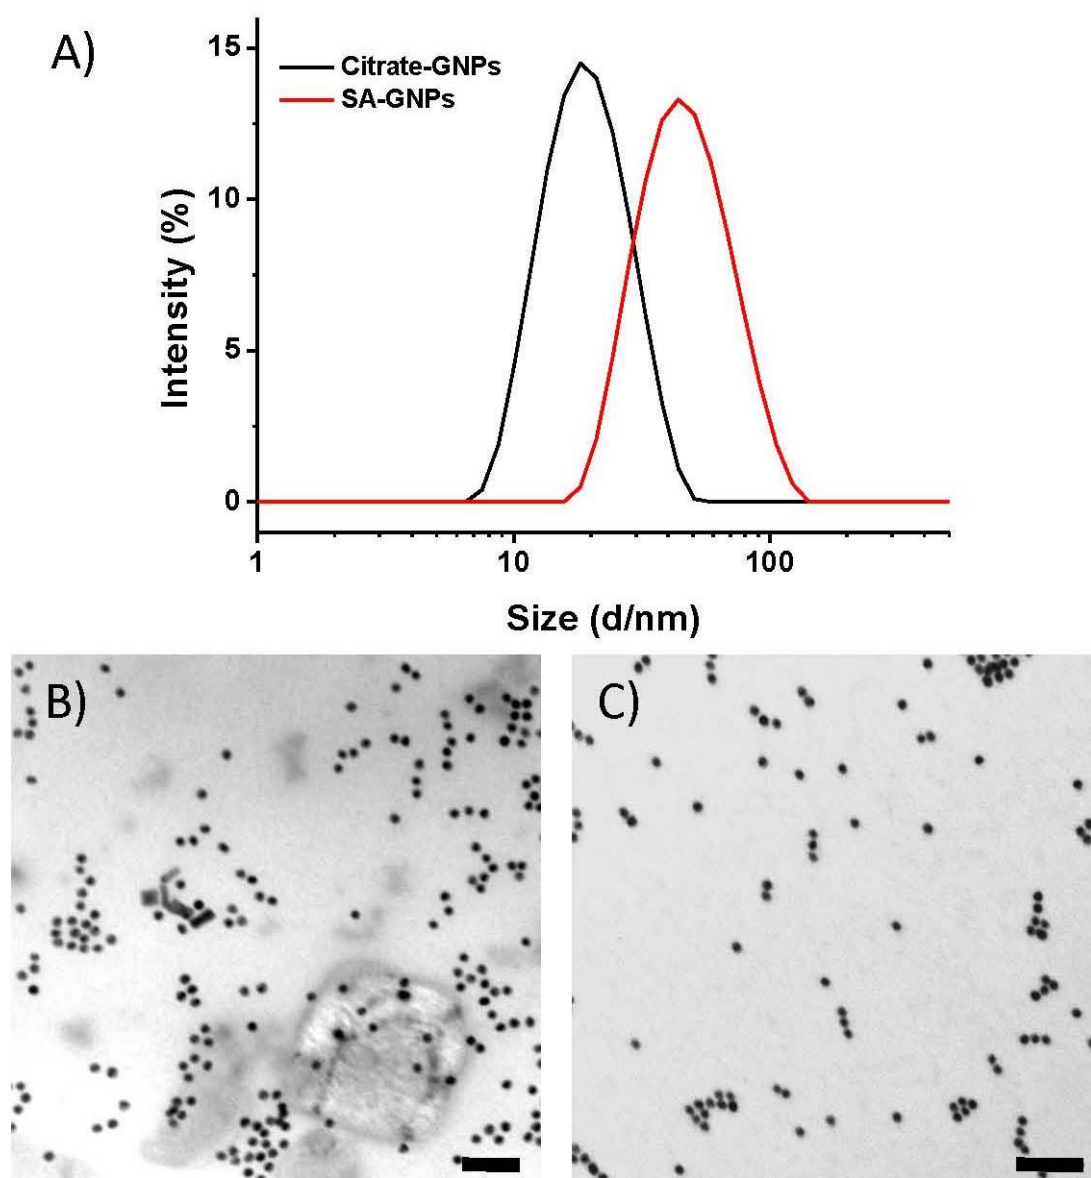

**Fig. S2** The hydrodynamic diameter distribution of synthesized and functionalized GNPs acquired from dynamic light scattering (DLS) experiment (A), the polydispersity index (PDI) of these two GNPs are 0.155 and 0.189, respectively; and the corresponding TEM micrographs of as-prepared citrate capping GNPs (B) and SA-GNPs (C). The scale bars indicate 100 nm.

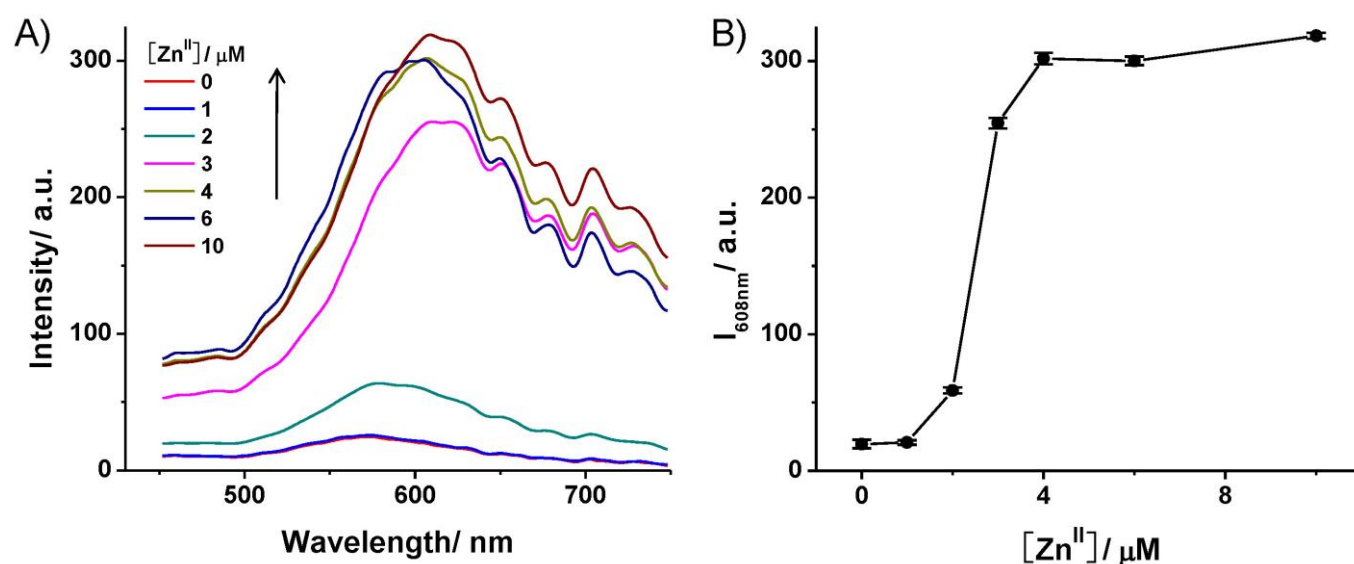

**Fig. S3** The RLS spectra of SA-GNPs after incubated with  $Zn^{II}$  induced  $A\beta_{1-16}$ (biotin) aggregates in HEPES solution in the presence of  $100 \mu g mL^{-1}$  HSA (A); and the RLS intensity at 608 nm as a function of the concentration of  $Zn^{II}$  (B), respectively. The concentration of  $A\beta_{1-16}$ (biotin) is  $2.0 \mu g mL^{-1}$ , and the concentration of SA-GNPs is  $1.2 nM$ , respectively.

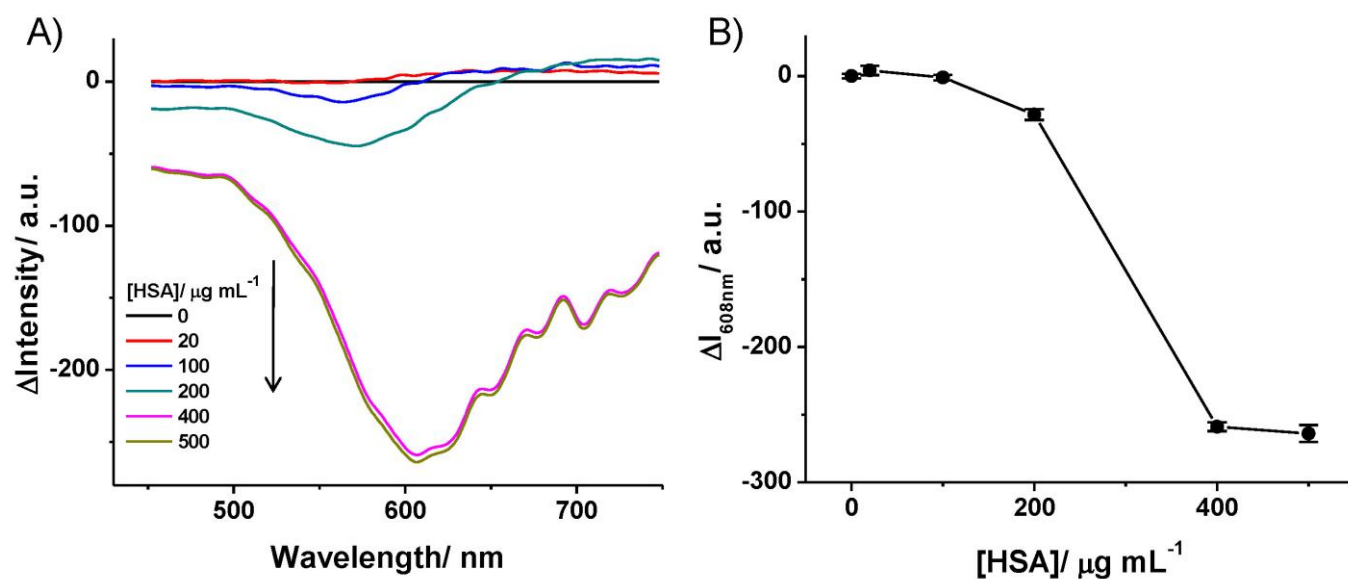

**Fig. S4** The RLS spectra changes of SA-GNPs with Zn<sup>II</sup> induced A $\beta$ <sub>1-16</sub>(biotin) aggregates by adding different amounts of HSA in aqueous solution (A); and the RLS intensity changes at 608 nm as a function of the concentration of HSA (B), respectively. The concentration of A $\beta$ <sub>1-16</sub>(biotin) is 2.0  $\mu$ g mL<sup>-1</sup>, the concentration of Zn<sup>II</sup> is 4.0  $\mu$ M, and the concentration of SA-GNPs is 1.2 nM, respectively. The RLS spectrum of SA-GNPs with Zn<sup>II</sup> induced A $\beta$ <sub>1-16</sub>(biotin) aggregates in the absence of HSA was used as blank.

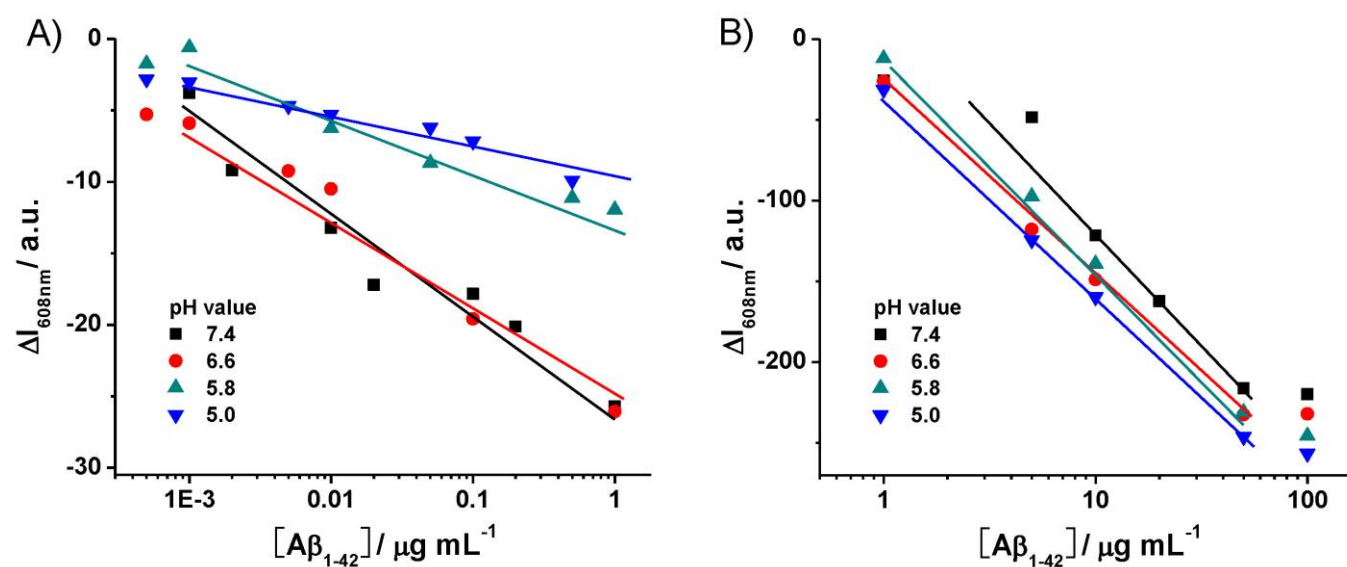

**Fig. S5** The effect of solution pH value on the detection of Aβ<sub>1-42</sub> in aqueous solutions. The RLS intensity changes at 608 nm as a function of the concentration of Aβ<sub>1-42</sub> below 1.0  $\mu\text{g mL}^{-1}$  (A); and above 1.0  $\mu\text{g mL}^{-1}$  (B), respectively. The concentration of Aβ<sub>1-16</sub>(biotin) is 2.0  $\mu\text{g mL}^{-1}$ , the concentration of Zn<sup>II</sup> is 4.0  $\mu\text{M}$ . and the concentration of SA-GNPs is 1.2 nM, respectively. The RLS spectra of SA-GNPs with Zn<sup>II</sup> induced Aβ<sub>1-16</sub>(biotin) aggregates in the absence of Aβ<sub>1-42</sub> were used as blanks, respectively. The slope of the line indicates the detection sensitivity of the assay.

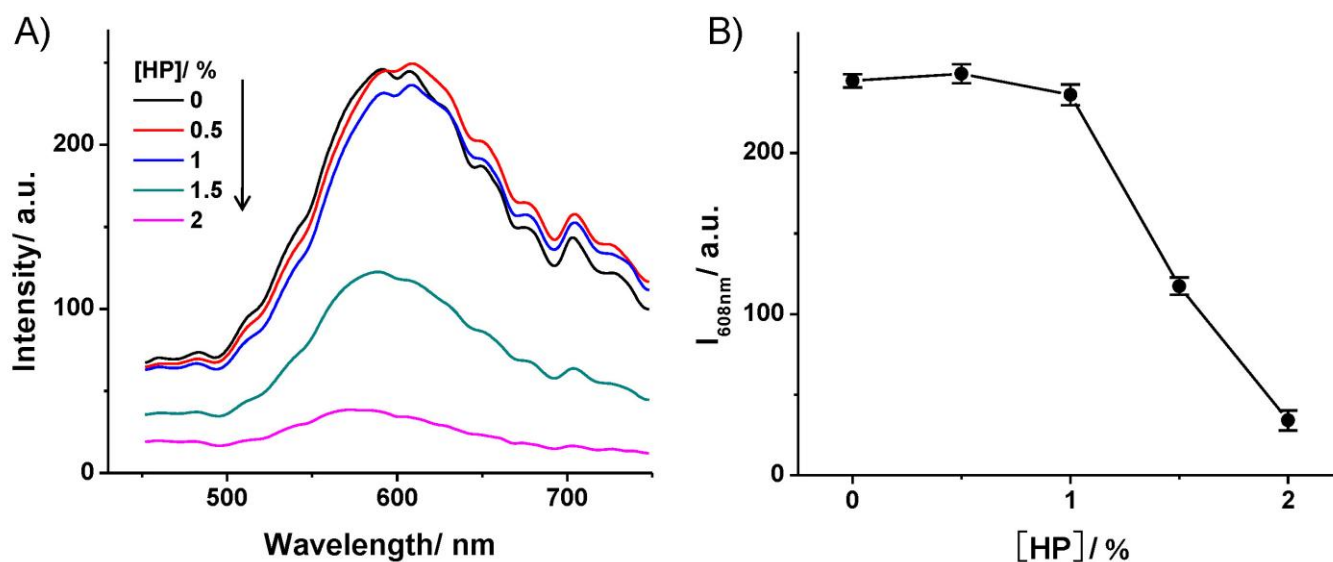

**Fig. S6** The RLS spectra of SA-GNPs after incubated with  $\text{Zn}^{\text{II}}$  induced  $\text{A}\beta_{1-16}(\text{biotin})$  aggregates in different concentrations of HP (A); and the RLS intensity at 608 nm as a function of the concentration of HP (B), respectively. The concentration of  $\text{A}\beta_{1-16}(\text{biotin})$  is  $2.0 \mu\text{g mL}^{-1}$ , the concentration of  $\text{Zn}^{\text{II}}$  is  $25.0 \mu\text{M}$ , and the concentration of SA-GNPs is  $1.2 \text{ nM}$ , respectively.

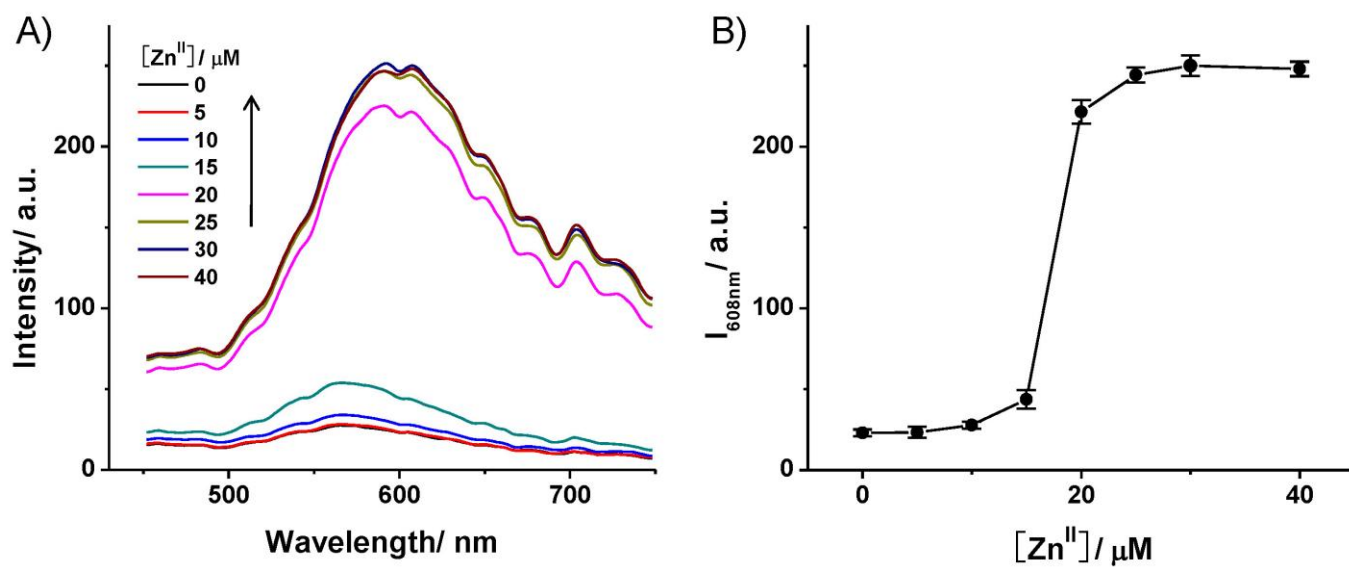

**Fig. S7** The RLS spectra of SA-GNPs after incubated with Zn<sup>II</sup> induced A $\beta$ <sub>1-16</sub>(biotin) aggregates in 1 % HP (A); and the RLS intensity at 608 nm as a function of the concentration of Zn<sup>II</sup> (B), respectively. The concentration of A $\beta$ <sub>1-16</sub>(biotin) is 2.0  $\mu g mL^{-1}$ , and the concentration of SA-GNPs is 1.2 nM, respectively.

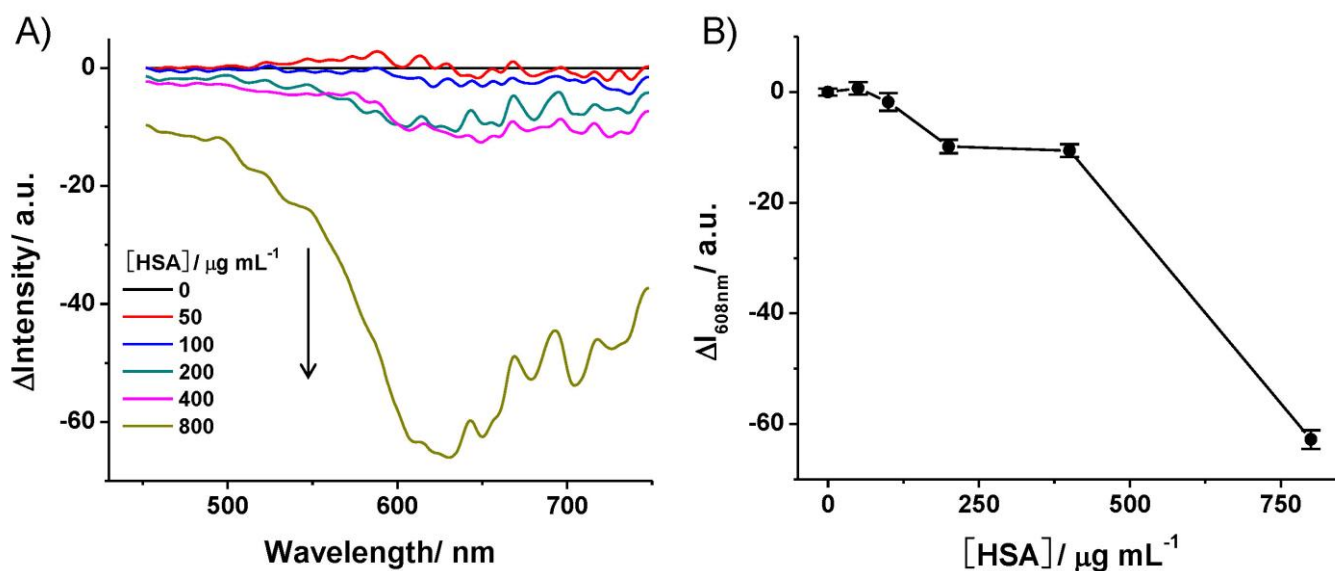

**Fig. S8** The RLS spectra changes of SA-GNPs with Zn<sup>II</sup> induced A $\beta$ <sub>1-16</sub>(biotin) aggregates by adding different amounts of HSA in 1 % HP (A); and the RLS intensity changes at 608 nm as a function of the concentration of HSA (B), respectively. The concentration of A $\beta$ <sub>1-16</sub>(biotin) is 2.0  $\mu$ g mL<sup>-1</sup>, the concentration of Zn<sup>II</sup> is 25.0  $\mu$ M, and the concentration of SA-GNPs is 1.2 nM, respectively. The RLS spectrum of SA-GNPs with Zn<sup>II</sup> induced A $\beta$ <sub>1-16</sub>(biotin) aggregates in the absence of HSA was used as blank.

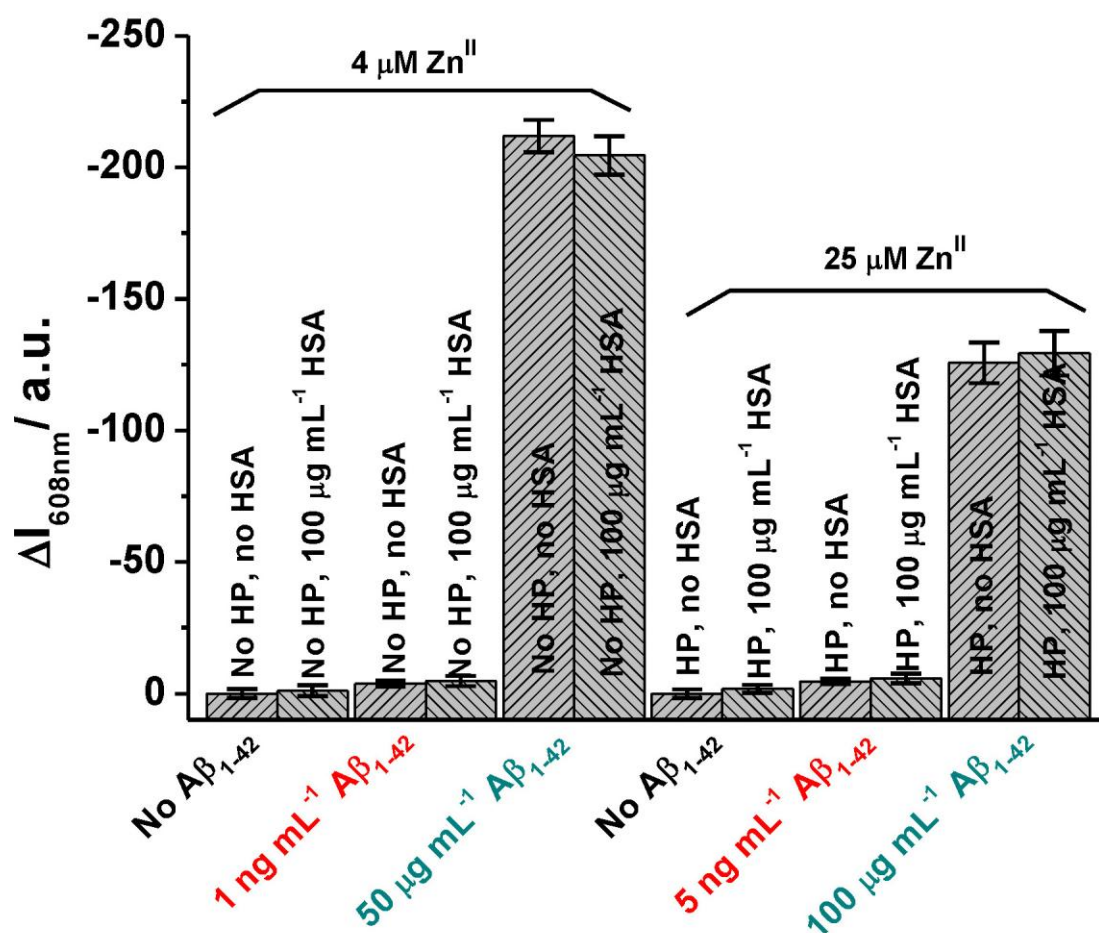

**Fig. S9** The interference of HSA on the detection of  $A\beta_{1-42}$  in aqueous solutions and in diluted HP, respectively. The concentration of  $A\beta_{1-16}(\text{biotin})$  is  $2.0 \mu g \text{ mL}^{-1}$ , and the concentration of SA-GNPs is  $1.2 \text{ nM}$ , respectively. The solutions in the absence of  $A\beta_{1-42}$  and HSA in aqueous solutions or in diluted HP were used as blanks, respectively.

**Table. S1 Comparison of our work with previous methods to detect A $\beta$  related molecules in aqueous solutions and cell derived samples.**

| Samples              | Detected species                                      | Methods                                                                           | Linear range/ Limit of detection                                                        | References                                              |
|----------------------|-------------------------------------------------------|-----------------------------------------------------------------------------------|-----------------------------------------------------------------------------------------|---------------------------------------------------------|
| Aqueous solution     | Tau protein                                           | Two-photo rayleigh scattering (using antibody)                                    | 5-350 ng mL <sup>-1</sup>                                                               | <i>ACS Nano</i> <b>2009</b> , 3, 2834-2840              |
| Aqueous solution     | Tau protein                                           | Fluorescence analysis (designed fluorescent molecule)                             | 0-1250 $\mu$ g mL <sup>-1</sup> can be detected                                         | <i>J. Am. Chem. Soc.</i> <b>2009</b> , 131, 6543-6548   |
| Aqueous solution     | Tau protein                                           | SPR, Immunochip (using antibody)                                                  | Limit of detection: 0.01 ng mL <sup>-1</sup>                                            | <i>Talanta</i> <b>2008</b> , 74, 1038-1042              |
| Aqueous solution     | A $\beta$ <sub>1-40</sub> / A $\beta$ <sub>1-42</sub> | Electrochemistry (using antibody)                                                 | 2-40 $\mu$ g mL <sup>-1</sup>                                                           | <i>Bioelectrochemistry</i> <b>2008</b> , 74, 118-123    |
| Aqueous solution     | A $\beta$ <sub>1-28</sub> / A $\beta$ <sub>1-40</sub> | Fluorescence analysis                                                             | 0-5 $\mu$ g mL <sup>-1</sup>                                                            | <i>Protein Sci.</i> <b>1993</b> , 2, 404-410            |
| Aqueous solution     | A $\beta$ <sub>1-40</sub> / A $\beta$ <sub>1-42</sub> | Electrochemistry                                                                  | Limit of detection: 0.7 $\mu$ g mL <sup>-1</sup>                                        | <i>J. Am. Chem. Soc.</i> <b>2005</b> , 127, 11892-11893 |
| Cell derived samples | A $\beta$ <sub>1-42</sub>                             | Flow cytometry-fluorescence resonance energy transfer (using antibody)            | 0.04-10 ng mL <sup>-1</sup>                                                             | <i>J. Alzheimer's Dis.</i> <b>2007</b> , 11, 117-125.   |
| Cell derived samples | A $\beta$ <sub>1-40</sub> / A $\beta$ <sub>1-42</sub> | Immunoprecipitation-HPLC-MS                                                       | 0.0004-0.012 ng mL <sup>-1</sup>                                                        | <i>FEBS letters</i> <b>1998</b> , 430, 419-423          |
| Cell derived samples | A $\beta$ <sub>1-40</sub>                             | Liquid chromatography - capillary electrophoresis -electrospray mass spectrometry | Limit of detection: 25 ng mL <sup>-1</sup>                                              | <i>J. Chromatogr. A.</i> <b>2002</b> , 974, 135-142     |
| Aqueous solution     | A $\beta$ <sub>1-42</sub>                             | RLS                                                                               | 1 ng mL <sup>-1</sup> -2.5 $\mu$ g mL <sup>-1</sup> and 2.5-50 $\mu$ g mL <sup>-1</sup> | Our present work                                        |
| 1 % human plasma     | A $\beta$ <sub>1-42</sub>                             | RLS                                                                               | 5 ng mL <sup>-1</sup> -20 $\mu$ g mL <sup>-1</sup> and 20-100 $\mu$ g mL <sup>-1</sup>  |                                                         |

## References

- S1 (a) J. Turkevich, P. Stevenson and J. Hillier, *Discuss. Faraday Soc.*, 1951, **11**, 55-75. (b) G. Frens, *Nature Phys. Sci.*, 1973, **241**, 20-22.
- S2 (a) C. Wang, J. Wang, D. Liu and Z. Wang, *Talanta*, 2010, **80**, 1626-1631. (b) C. Wang, J. Wang, D. Liu and Z. Wang, *Anal. Methods*, 2010, **2**, 1467-1471.
